# Supplementary material
Source: Research Square preprint supplement (doi:10.21203/rs.3.rs-9442808/v1)
Supplement: Supplementary file 1 [file 1858674b103a549d2dc97624.docx]

**Appendix Table 2**: Definitions of PANS disease state and disease course (adapted from Masterson et al. 2025, Table 2 and Figure 3).

| Term | Definition |
| --- | --- |
| **Baseline impairment level** | A patient’s level of functioning prior to their initial neuropsychiatric flare, which, for some patients, may include symptoms related to other conditions such as ADHD, ASD, etc. |
| **Patient Status (Disease State)** | |
| **In flare** | In a state of escalated symptoms and heightened functional impairment relative to a patient’s baseline impairment level    Note 1: this does not include minor symptom escalations (see below)  Note 2: this includes flare(s) on good baseline and flare(s) on persistent disease course. See definition of persistent course below. |
|  | **Isolated flare:** the occurrent of one flare start, which ends with an unequivocal recovery |
|  | **Flare series:** the consecutive occurrence of at least two flare starts without an unequivocal recovery between; a notable exacerbation of symptoms and/or an escalation in new symptoms (i.e., a new flare) that occurs during an ongoing flare |
| **In recovery** | In a state of improvement regarding symptoms and function relative to the peak symptoms of the most recent flare    Note: in our database, an unequivocal recovery from escalated symptoms and heightened functional impairment indicates the end of a flare |
|  | **Partial recovery:** unequivocally recovered from a flare, but with residual functional deficits from the prior flare(s) that are above their baseline impairment level    Note: a partially recovered patient may eventually reach a “full” recovery |
|  | **Full recovery:** unequivocally recovered from a flare; symptoms and functional impairment are equivalent or near equivalent to patient’s baseline impairment level |
| **Minor symptom escalation** | A slight increase in neuropsychiatric symptoms that does not drastically increase patient functional impairment    Note: these samples were not used for this study |
| **Clinical Course (Disease Course)** | |
| **Single Flare** | Characterized by one recorded flare to date |
| **Relapsing-Remitting** | Characterized by intermittent flare and recovery intervals; has had at least one unequivocal recovery and subsequent flare start |
| **Primary Persistent** | Characterized by an initial flare (isolated or flare series) that lasts >12 months without an unequivocal recovery |
| **Secondary Persistent** | Characterized by a subsequent flare (isolated or flare series) that lasts >12 months without an unequivocal recovery |

**Appendix Table 3.** List of abbreviations of genes and molecules mentioned in this study.

| CLDN3 — Claudin-3 |
| --- |
| APOE — Apolipoprotein E |
| ICAM1 — Intercellular Adhesion Molecule 1 |
| NECTIN2 — Nectin Cell Adhesion Molecule 2 (also known as PVRL2) |
| FN1 — Fibronectin 1 |
| CLDN5 — Claudin-5 |
| F11R — F11 Receptor (Junctional Adhesion Molecule A; JAM-A) |
| CXCR4 — C-X-C Motif Chemokine Receptor 4 |
| JAM2 — Junctional Adhesion Molecule 2 (also known as JAM-B) |
| TGFB1 — Transforming Growth Factor Beta 1 |
| OCLN — Occludin |
| SLC2A1 — Solute Carrier Family 2 Member 1 (GLUT1) |
| CTNNB1 — Catenin Beta 1 (β-catenin) |
| CDH2 — Cadherin 2 (N-cadherin) |
| ANGPT2 — Angiopoietin 2 |
| ICAM2 — Intercellular Adhesion Molecule 2 |
| CDH5 — Cadherin 5 (VE-cadherin) |
| HIF1A — Hypoxia Inducible Factor 1 Alpha |
| TJP1 — Tight Junction Protein 1 (ZO-1) |
| ITGB1 — Integrin Subunit Beta 1 |
| CDC42 — Cell Division Cycle 42 |
| ANGPT1 — Angiopoietin 1 |
| NECTIN1 — Nectin Cell Adhesion Molecule 1 (PVRL1) |
| JAM3 — Junctional Adhesion Molecule 3 (JAM-C) |
| HEG1 — Heart Development Protein With EGF-Like Domains 1 |
| GJA1 — Gap Junction Protein Alpha 1 (Connexin 43) |
| VCL — Vinculin |
| TJP2 — Tight Junction Protein 2 (ZO-2) |
| CLDN11 — Claudin-11 |
| ITGB3 — Integrin Subunit Beta 3 |
| CLDN12 — Claudin-12 |
| MFSD2A — Major Facilitator Superfamily Domain Containing 2A |

**Appendix Table 4**: Classes of medications taken by patients with PANS in this study during flare and recovered states at the time of or leading up to blood draw.

|  | Flare state  (n = 15) | Recovered state  (n = 15) |
| --- | --- | --- |
| Treatments at time of research blood draw, n (%) |  |  |
| Selective serotonin uptake inhibitors | 3 (20%) | 2 (13%) |
| Nonsteroidal anti-inflammatory drugs | 7 (47%) | 11 (73%) |
| Treatments leading up to blood draw, n (%) |  |  |
| Corticosteroids (oral) in prior 4 weeks | 1 (7%) | 0 (0%) |
| Corticosteroids (intravenous) in prior 4 weeks | 0 (0%) | 1 (7%) |
| Intravenous immunoglobulin within the past 3 months | 1 (7%) | 2 (13%) |
| Disease-modifying antirheumatic drugs within the past 3 months | 2 (13%) | 3 (33%) |
| Antibiotics within the past 3 months | 9 (60%) | 7 (47%) |
| Not on medication at time of or 3 months prior to blood draw, n (%) | 4 (27%) | 2 (13%) |
