# Supplementary material
Source: Research Square preprint supplement (doi:10.21203/rs.3.rs-9442808/v1)
Supplement: Supplementary file 2 [file c230d53dcb9b8b8b5acc8cf8.docx]

**Appendix 1: S100B in plasma of healthy controls and PANS (flare and recovered):** (A) Dot plot showing individual data points, representing plasma S100B concentration (pg/mL) measured by ELISA, in healthy controls (green), PANS flare (red) and PANS recovered (blue). Horizontal lines represent median. Significance was measured by Mann-Whitney U test, between healthy control and PANS flare. **p<0.001. (B) Paired dot plot representing the PANS flare and recovery samples. *p<0.05 Wilcoxon signed-rank test.

**Appendix 2: PANS flare plasma effects on BECs permeability kinetics, viability assay, and endothelial cell specificity (pulmonary, umbilical, brain):** (A) Kinetic analysis of BECs permeability following exposure to PANS flare plasma versus healthy control plasma. Data expressed as percentages relative to untreated control. Each point represents the median ± SD (healthy controls n=9; PANS flare n=12). Samples compared using two-way ANOVA with Bonferroni post hoc correction. (B) Dot plot showing BEC viability after 12 and 24 hours of exposure to plasma from healthy controls (green) and PANS flare (red), as measured by a viability assay using AlamarBlue™ and Cell Viability Reagent (ab112118). Horizontal lines indicate mean ± SD. (C) Bar graph quantifying the percentage change in endothelial cell monolayer permeability across three vascular sources: pulmonary artery endothelium, umbilical vein endothelium, and brain endothelium.

**Appendix 3: Multiplex cytokine and chemokine profiles of BECs supernatants following exposure to plasma or PANS flares and healthy controls:** Dot plots showing cytokine and chemokine concentrations in the BEC supernatant following exposure to plasma of PANS flare (n=5) and healthy controls (n=4). Dots represent the individual data points; horizontal lines represent the median.

**Appendix 4. Plasma chemokine and cytokine profiles are altered during PANS flare and partially normalize during recovery:** (A)Dot plots showing selected chemokines in PANS flares and healthy controls measured by multiplex assay. (B) Dot plots showing selected cytokines and growth factors in PANS flares and healthy controls measured by multiplex assay. (C) Dot plots showing selected chemokines in matched pairs. (D) Dot plots showing selected cytokines and growth factors in matched pairs.

**Appendix 5. CCL11 ELISA of plasma (PANS flare, recovery, and healthy controls)** (A) Dot plots showing CCL11 ELISA in the plasma of heathy controls (green) and PANS flare (red). Data represented as median. (B) Paired dot plot showing plasma CCL11 concentrations during PANS flare (red) and recovery (blue), with lines connecting matched samples. *p<0.05 using Wilcoxon signed-rank test.
